# Supplementary material for: Genetic Loci and Novel Discrimination Measures Associated with Blood Pressure Variation in African Americans Living in Tallahassee
Source: PubMed Central journal article supplement (PMC5176163; doi:10.1371/journal.pone.0167700), 2016-12-21
Supplement: pone.0167700.s001.pdf [file pone.0167700.s001.pdf]

| <b>Covariate</b>        | <b>SBP<sub>adj</sub></b> | <b>DBP<sub>adj</sub></b> |
|-------------------------|--------------------------|--------------------------|
| Global African Ancestry | 0.5331                   | 0.7272                   |
| Age                     | <0.0001                  | 0.0009                   |
| Sex                     | 0.0433                   | 0.8792                   |
| BMI                     | <0.0001                  | <0.0001                  |
| Education (years)       | 0.2661                   | 0.3292                   |
| UT-Self (0-9)           | 0.1499                   | 0.3972                   |
| UT-Other (0-7)          | 0.5826                   | 0.7857                   |
| UT-Self No/Yes          | 0.9844                   | 0.9994                   |
| UT-Other No/Yes         | 0.7302                   | 0.566                    |
| UT-Self Low/High        | 0.1683                   | 0.9432                   |
| UT-Other Low/High       | 0.2146                   | 0.4337                   |
| PC-AiR1                 | 0.2658                   | 0.7324                   |
| PC-AiR2                 | 0.6153                   | 0.9401                   |
| PC-AiR3                 | 0.7383                   | 0.294                    |
| PC-AiR4                 | 0.2806                   | 0.1268                   |
| PC-AiR5                 | 0.9969                   | 0.6097                   |
| PC-AiR6                 | 0.8727                   | 0.8387                   |
| PC-AiR7                 | 0.2654                   | 0.1801                   |
| PC-AiR8                 | 0.0012                   | 0.0957                   |
| PC-AiR9                 | 0.2106                   | 0.1192                   |
| PC-AiR10                | 0.2319                   | 0.1726                   |
