# Supplementary material for: Genetic Loci and Novel Discrimination Measures Associated with Blood Pressure Variation in African Americans Living in Tallahassee
Source: PubMed Central journal article supplement (PMC5176163; doi:10.1371/journal.pone.0167700), 2016-12-21
Supplement: pone.0167700.s002.pdf [file pone.0167700.s002.pdf]

| Model    | UT           | SNP         | Chr | Position (bp) | Type     | Assoc. Gene      | MAF  | Local AA** | Admix posterior | GWAS posterior | Joint posterior |
|----------|--------------|-------------|-----|---------------|----------|------------------|------|------------|-----------------|----------------|-----------------|
| Model 1  | N/A          | rs56766116  | 1   | 53757257      | Intronic | <i>LRP8</i>      | 0.04 | 0.69       | 0.055           | 0.99           | 1.00            |
|          |              | rs6739240   | 2   | 30978800      | Intronic | <i>CAPN13</i>    | 0.26 | 0.70       | 7.021E-5        | 0.39           | 0.56            |
|          |              | rs72783028  | 2   | 30980259      | Intronic | <i>CAPN13</i>    | 0.01 | 0.70       | 7.021E-5        | 0.99           | 1.00            |
|          |              | rs6791604   | 3   | 69848416      | Intronic | <i>MITF</i>      | 0.08 | 0.64       | 2.21E-6         | 0.99           | 0.82            |
|          |              | rs2320172   | 3   | 69916637      | Intronic | <i>MITF</i>      | 0.14 | 0.64       | 2.21E-6         | 0.99           | 0.88            |
|          |              | rs2116737   | 5   | 155450424     | Intronic | <i>SGCD</i>      | 0.30 | 0.87       | 0.022           | 0.0018         | 0.52            |
|          |              | rs80149157  | 7   | 151911409     | Intronic | <i>MLL3</i>      | 0.07 | 0.67       | 4.36E-6         | 0.99           | 1.00            |
|          |              | rs67579183  | 7   | 152086858     | Intronic | <i>MLL3</i>      | 0.08 | 0.66       | 4.64E-6         | 0.99           | 0.98            |
| Model 2  | UT-Self      | rs2116737   | 5   | 155450424     | Intronic | <i>SGCD</i>      | 0.30 | 0.87       | 0.021           | 0.0031         | 0.64            |
|          | UT-Other     | rs115805528 | 3   | 69953514      | Intronic | <i>MITF</i>      | 0.04 | 0.64       | 1.97E-6         | 0.99           | 1.00            |
|          |              | rs7962445   | 12  | 11305844      | Intronic | <i>PRH1-PRR4</i> | 0.36 | 0.36       | 0.0054          | 0.29           | 0.98            |
| Model 3  | SNP*UT-Self  | rs11190458  | 10  | 102053992     | Intronic | <i>PKD2L1</i>    | 0.39 | 0.70       | 0.0011          | 0.064          | 0.58            |
| No/yes   | SNP*UT-Other | rs35283004  | 5   | 1.5E+08       | Upstream | <i>HTR4</i>      | 0.22 | 0.86       | 2.26E-6         | 0.97           | 0.56            |
|          |              | rs11042725  | 11  | 10325325      | Upstream | <i>SBF2</i>      | 0.31 | 0.80       | 0.0027          | 0.80           | 0.99            |
|          |              | rs547330    | 3   | 100485785     | Intronic | <i>ABI3BP</i>    | 0.24 | 0.85       | 0.000014        | 0.86           | 0.62            |
| Model 3  | SNP*UT-Other | rs12050767  | 15  | 51557257      | Intronic | <i>CYP19A1</i>   | 0.38 | 0.69       | 0.000030        | 1.00           | 1.00            |
| Low/High |              | rs34712049  | 15  | 51560064      | Intronic | <i>CYP19A1</i>   | 0.27 | 0.69       | 0.000030        | 1.00           | 1.00            |

\*Note: posterior probability  $\geq 0.5$  is significant

\*\*local AA = mean local African Ancestry
